# Supplementary material for: Carbon-rich lunar core evidenced by isostructural phase transitions in iron
Source: Research Square preprint supplement (doi:10.21203/rs.3.rs-7903808/v1), 2025-11-13
Supplement: Supplementary file 1 [file 64f6e106307aafe7f64cbe84.docx]

**Supporting materials**

**Fig. S1-S7**


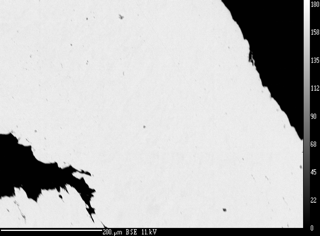

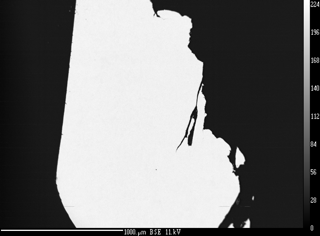


**Supplementary Fig. S1.** Back scattering electron images of Fe-0.2C (left) and Fe-1.7C (right).


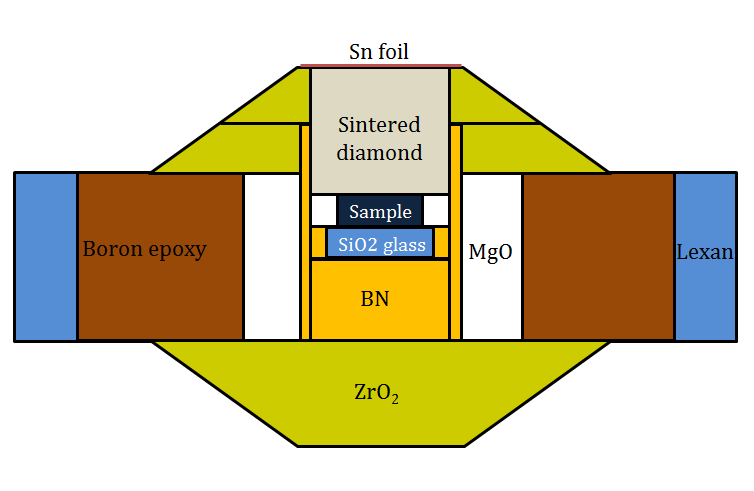

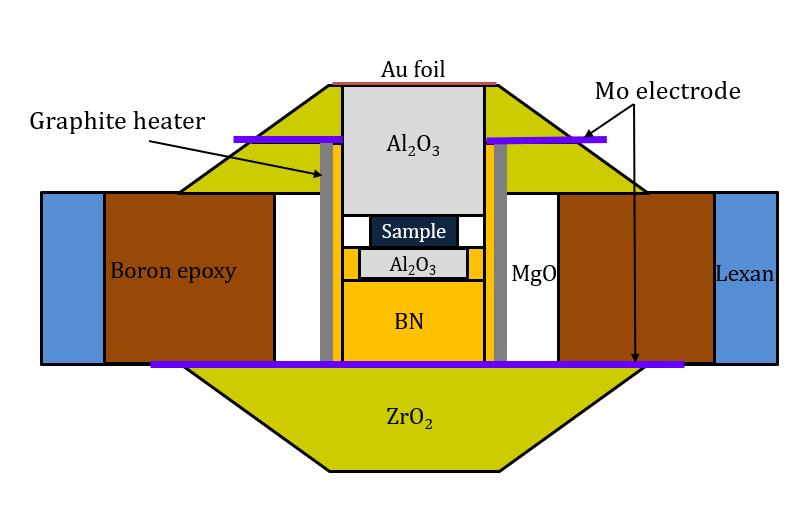


**Supplementary Fig. S2.** High-pressure PE cell assembly for acoustic velocity measurements of Fe and Fe-C alloys. Up: room temperature cell; Down: high-temperature cell.


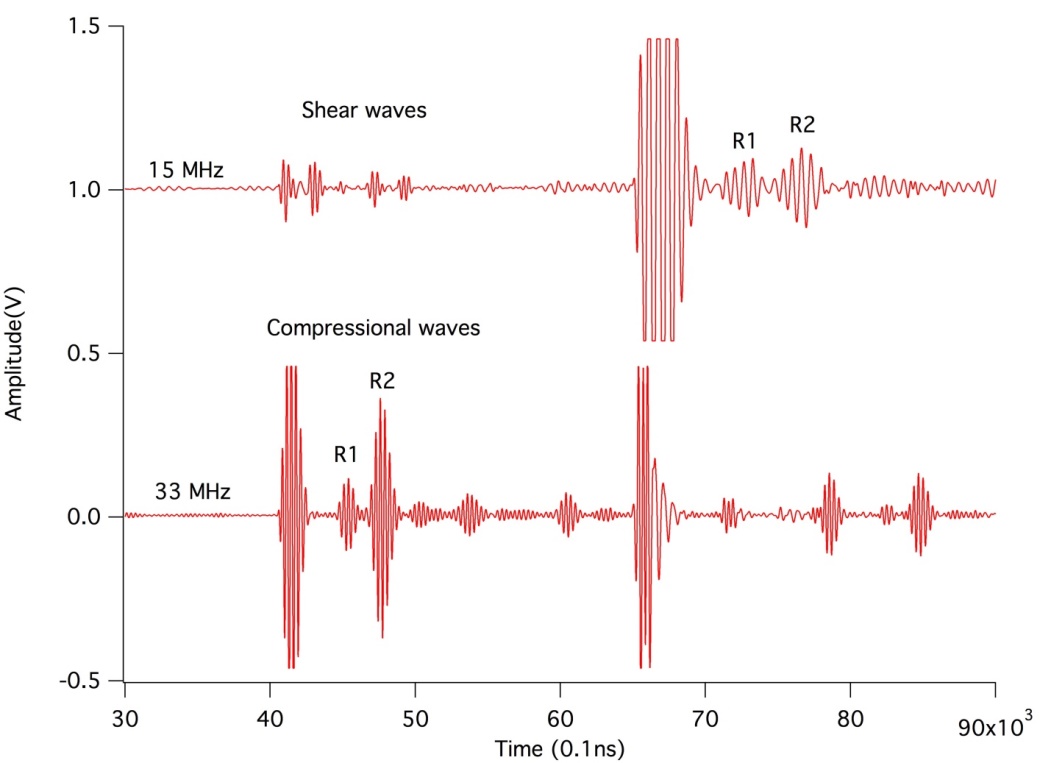


**Supplementary Fig. S3.** Representative *VP* and *VS* signals at 3.5 GPa and 1200 K. R1 and R2 signals represent reflected acoustic waves at the interfaces of the sample and alumina rods.

**Synchrotron Mӧssbauer spectroscopy (SMS)**

The SMS spectra of 57Fe-enriched Fe-0.2C sample were collected at beamline 16ID-D, APS, ANL. The incident X-ray beam with a monochromatic energy of 14.41 keV and a bandwidth of 2 meV was focused to 5 × 7 µm in the Full width at half maximum (FWHM) on the sample position to excite 57Fe nuclei. An avalanche photodiode detector (APD) was employed to collect the time-delayed SMS signals in the forward direction with a collection time of about 3–4 hours for each pressure datapoint. Pressure was calibrated before and after each measurement using the fluorescence of ruby with an uncertainty of 0.1–0.4. A platelet of the Fe-0.2C sample with a thick of ~70 μm was loaded into the sample chamber of Re gasket in a symmetric DAC. The diamond anvil culet size was 500 μm. Silicon oil served as a pressure-transmitting medium. Mössbauer hyperfine parameters, including quadrupole splitting and magnetic hyperfine field of the Fe-0.2C sample were derived using the CONUSS program 1.


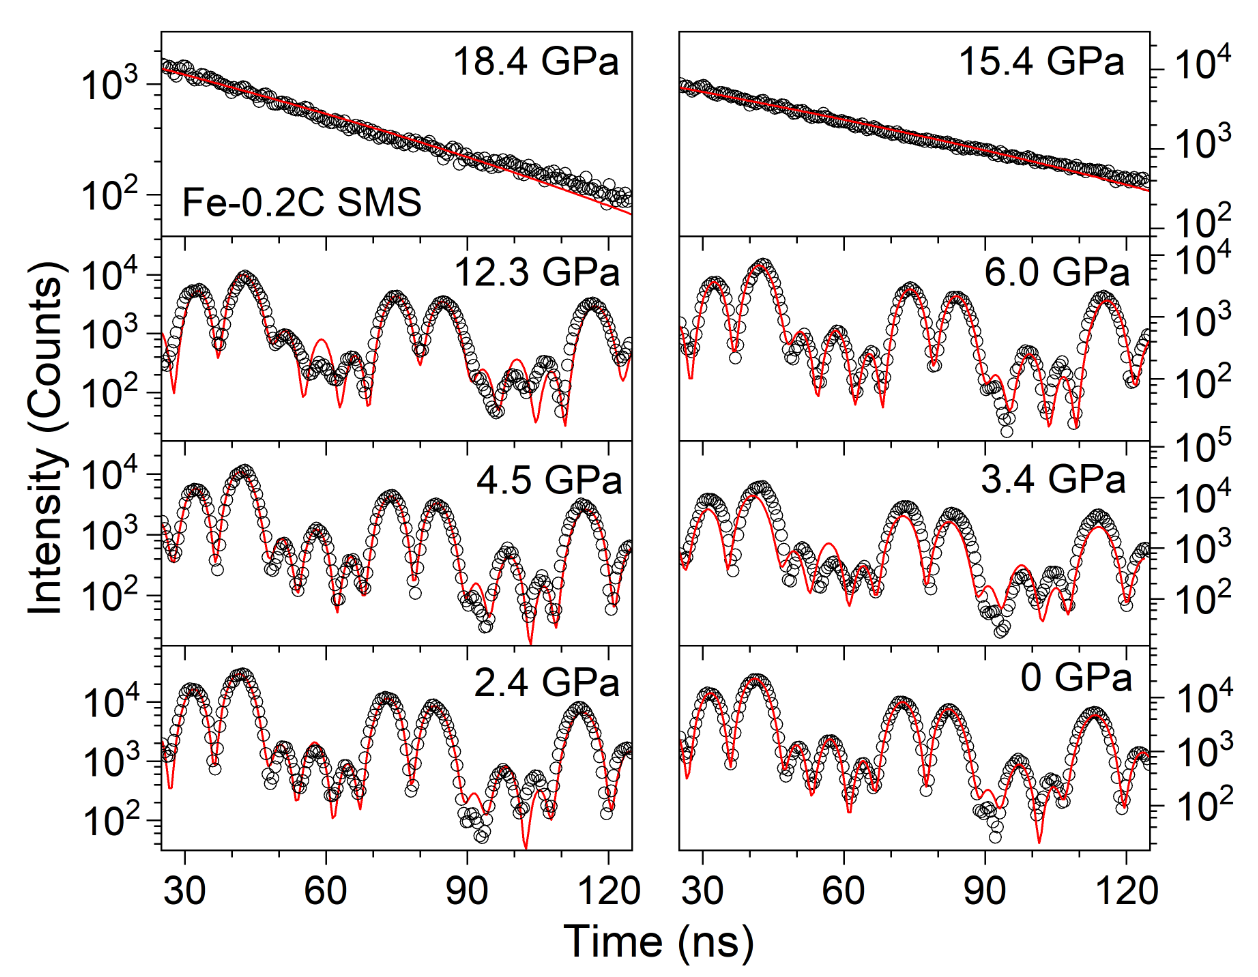


**Supplementary Fig. S4.** SMS spectra of 57Fe-enriched Fe-0.2C up to 18.4 GPa at room temperature.


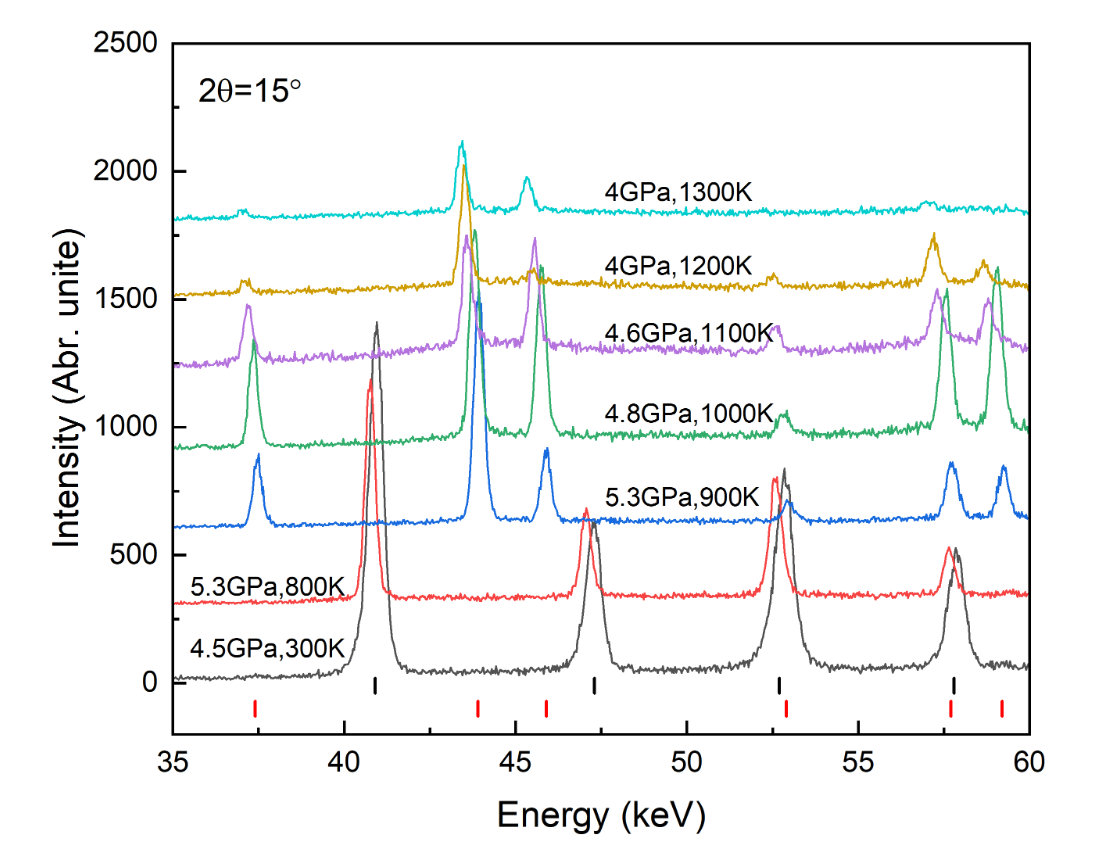


**Supplementary Fig. S5.** EDXRDs of Fe-0.2C at high pressure and high temperature. The short vertical lines denote the peaks of bcc (black) and fcc (red) phases.


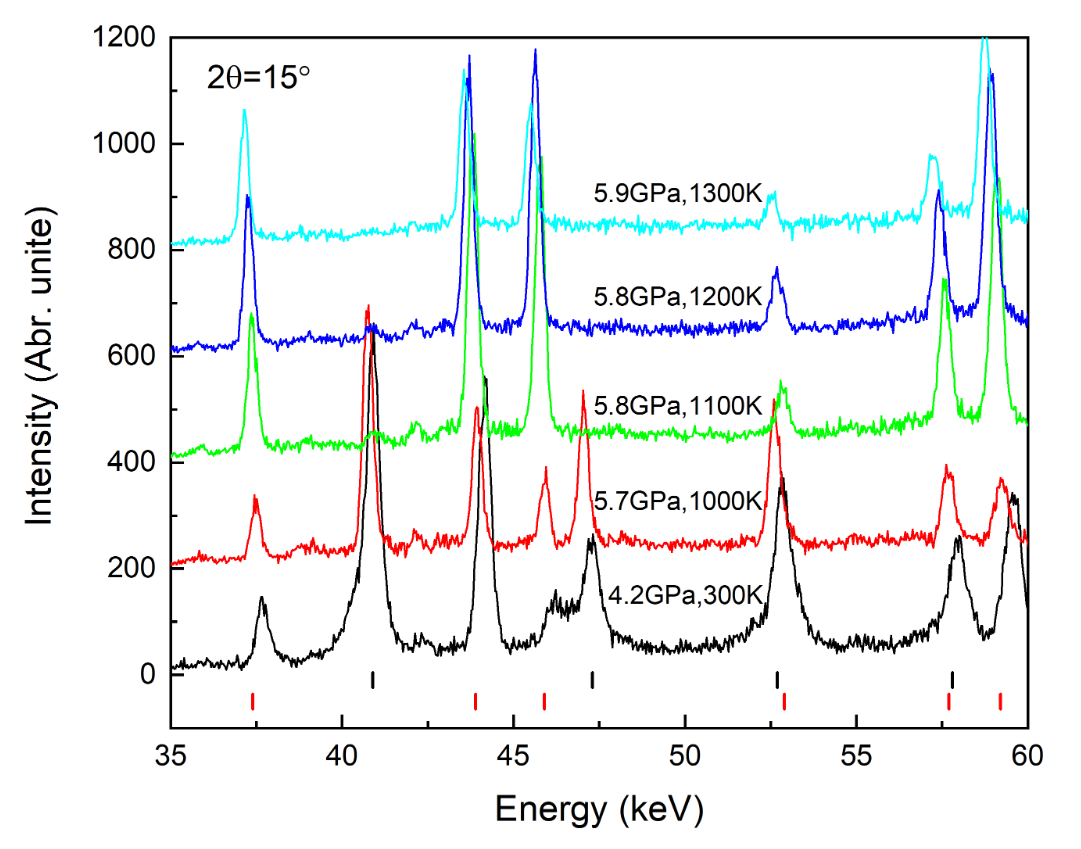


**Supplementary Fig. S6.** EDXRDs of Fe-1.7C at high pressure and high temperature. The short vertical lines denote the peaks of bcc (black) and fcc (red) phases.

**Temperature effect on acoustic velocities**

The temperature effect on acoustic velocities is presented in Supplementary Fig. S7. The *VP* of bcc-I Fe-0.2C keeps constant as a function of temperature below 600 K, indicating a negligible temperature effect in this temperature range. However, as temperature increases further, the *VP*s at all three heating cycles decrease versus temperature. The temperature dependence is about 0.0018 . An interesting observation is that there is a discontinuity at ~800 K in the 1.3-2.5 GPa dataset of bcc-I Fe-0.2C. The XRD shows it is in bcc phase, but *VP* drops from 6.3 km/s to 5.6 km/s and it keeps ~5.6 km/s before the bcc-fcc phase transition. This might be attributed to approaching the bcc-fcc phase boundary. Temperature effect is invisible on *VP* of bcc-II and fcc-I Fe-0.2C. It is long being known that *VS* is temperature-sensitive 2-4. The temperature dependence of *VS* for bcc-Fe-0.2C (bcc-I and bcc-II) is comparable to that of its fcc counterpart (fcc-I and fcc-II), which is ~0.0013 . The temperature effect on *VP* of Fe-1.7C is difficult to describe because it is in mixed bcc and fcc phase below 1000 K. It seems temperature effect on *VP* could be neglected in bcc&fcc-I phase. While temperature may pose an effect on bcc&fcc-II phase, because the *VP* decrease as a function of temperature. Similar *VP* drops (0.6-1.0 km/s) are observed in bcc&fcc phase around 900 K in the three heating cycles. The *VP* drops at ~800 K in Fe-0.2C and at ~900 K in Fe-1.7C indicate that the phase boundaries determined by acoustic velocity and XRD are slightly different. A 200-300 K difference would exist. It is unlikely to analyze the temperature effect on *VP* of both fcc-I and fcc-II Fe-1.7C because of the limited data. The temperature effects of *VS* for both bcc&fcc- and fcc-Fe-1.7C are same, which is ~0.0007 .

The current *VP* of fcc-Fe is in the range of 5.5-5.7 km, which is in good accord with the extrapolated results to lower pressure in ref. 5. 0.2wt.% carbon has negligible effect on *VP* of fcc-Fe below 4.5 GPa, while 1.7wt.% carbon could lower down the *VP* by ~0.4 km/s. The effect of carbon on *VP* of fcc-Fe at fcc-I stabilized P-T conditions is contrary to that of light elements on bcc-Fe, hcp-Fe, and liquid Fe 6-8. Contrary effect can also be observed in *VS* of fcc-I Fe-C alloys. The *VS* of fcc-Fe is ~3.0 km/s, however those of fcc-I Fe-0.2C and fcc-I Fe-1.7C are in the range of 2.4-2.7 km/s. A reduction of 0.3-0.6 km/s is caused by 0.2-1.7wt.% carbon. Compared with the light element effect on *VP* and *VS*, the ISPT induce much more velocity reduction. Above 4 GPa, the *VP* and *VS* of fcc-II Fe-C alloys are reduced by ~1.0 km/s and ~0.5 km/s, respectively.


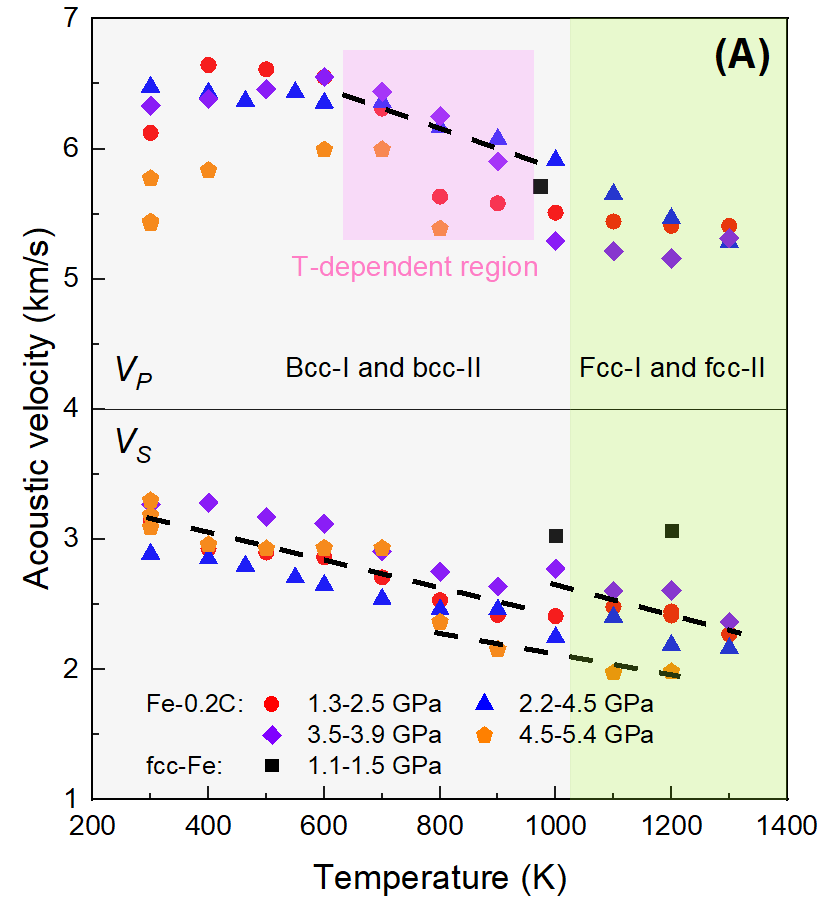

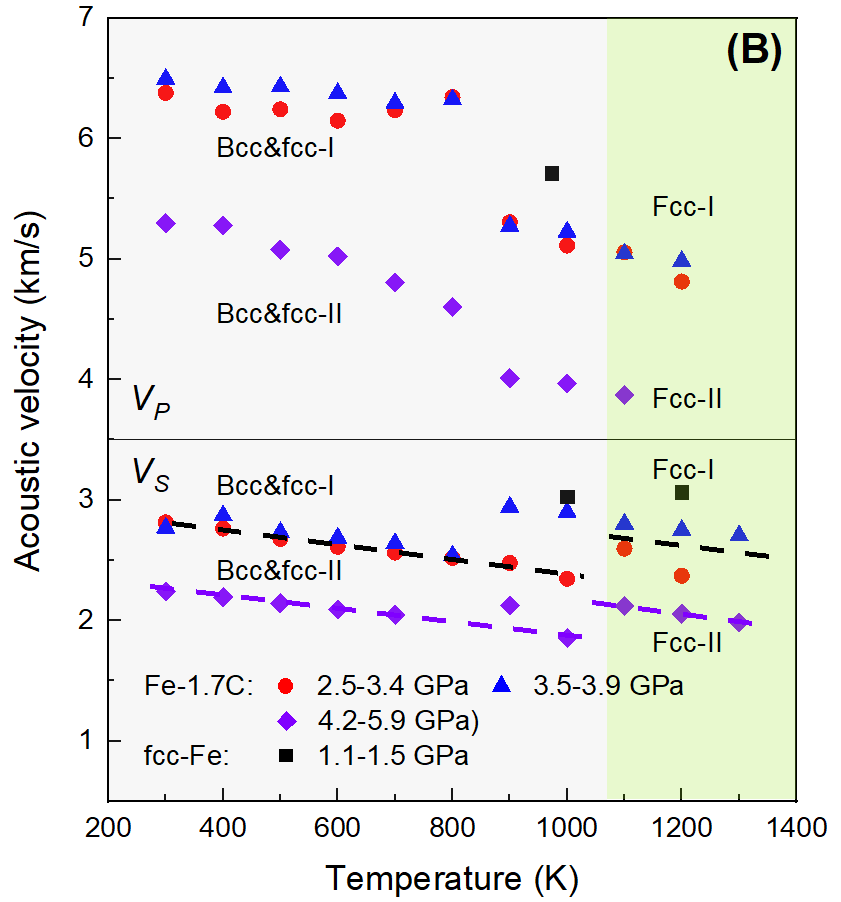


**Supplementary Fig. S7.** Temperature effect on acoustic velocities of Fe-0.2C (A) and Fe-1.7C (B)**.** The dash curves are hand-drawn variation trends of *VP* and *Vs* as a function of temperature. Each colored symbol represents a heating cycle. During a heating cycle, the pressure increases because of the thermal contribution.

**Phase diagram of Fe-1.7C**

The phase diagram of Fe-1.7C is shown in Fig. S8. The incorporation of 1.7wt.% carbon could slightly lower down the bcc/fcc phase boundary (blue dash curve) of the Fe. The phase boundary of bcc-I/II and fcc-I/II Fe-1.7C is also depressed by about 1 GPa compared with that of Fe-0.2C.


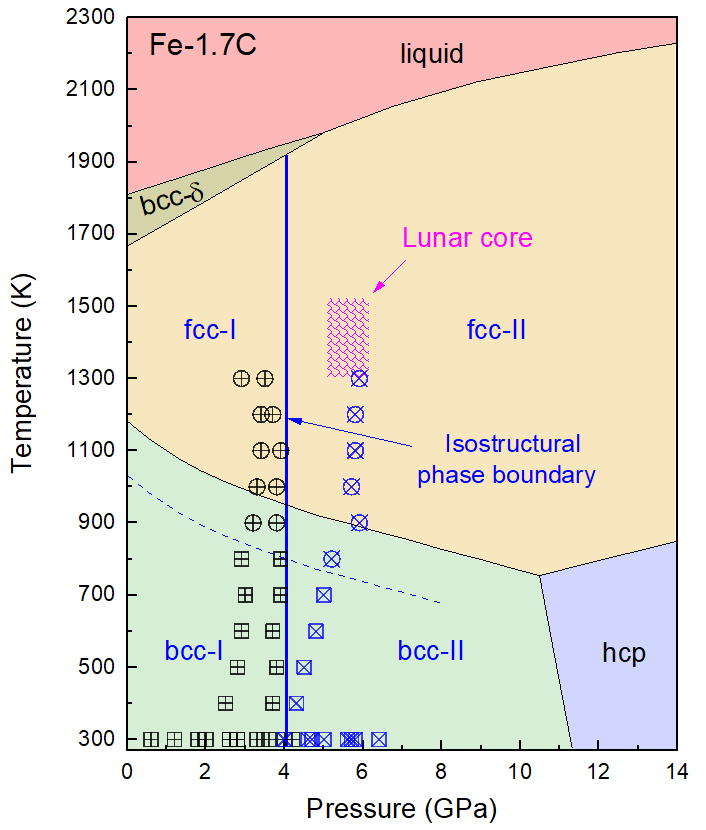


**Supplementary Fig. S8.** Phase diagram of Fe-1.7C.

**Reference**

1 Sturhahn, W. Nuclear resonant spectroscopy. *J. Phys. Condens. Matt.* **16**, S497 (2004).

2 Shibazaki, Y. *et al.* Compressional and shear wave velocities for polycrystalline bcc-Fe up to 6.3 GPa and 800 K. *Am. Mineral.* **101**, 1150-1160 (2016).

3 Whitaker, M. L., Liu, W., Liu, Q., Wang, L. & Li, B. Thermoelasticity of ε-FeSi to 8 GPa and 1273 K. *Am. Mineral.* **94**, 1039-1044 (2009).

4 Lin, J.-F. *et al.* Sound velocities of hot dense iron: Birch's law revisited. *Science* **308**, 1892-1894, doi:10.1126/science.1111724 (2005).

5 Antonangeli, D. *et al.* Toward a mineral physics reference model for the Moon’s core. *Proc. Nat. Acad. Sci.* **112**, 3916-3919 (2015).

6 Liu, J., Lin, J.-F., Alatas, A. & Bi, W. Sound velocities of bcc-Fe and Fe0. 85Si0. 15 alloy at high pressure and temperature. *Phys. Earth Planet. Inter.* **233**, 24-32 (2014).

7 Shimoyama, Y. *et al.* Thermoelastic properties of liquid Fe‐C revealed by sound velocity and density measurements at high pressure. *J. Geophys. Res.* **121**, 7984-7995 (2016).

8 Lin, J. F. *et al.* Sound velocities of iron‐nickel and iron‐silicon alloys at high pressures. *Geophys. Res. Lett.* **30** (2003).
